# Supplementary material for: Effect of Real-time Patient-Centered Education Bundle on Administration of Venous Thromboembolism Prevention in Hospitalized Patients
Source: PubMed Central journal article supplement (PMC6324387; doi:10.1001/jamanetworkopen.2018.4741), 2018-11-16
Supplement: jamanetwopen-1-e184741-s001.pdf [file jamanetwopen-1-e184741-s001.pdf]

1 **Title:**

2 Education Bundle to Decrease Patient Refusal of Venous Thromboembolism  
3 Prophylaxis

4

5 **Registration:**

6 <https://clinicaltrials.gov/ct2/show/NCT02402881>

7

8 **Funding:**

9 Patient Centered Outcomes Institute (PCORI)

10 The funders will have no role in the conduct of this study

11

12

13 **Contact Information**

14 Elliott R. Haut, MD, PhD, FACS  
15 Division of Acute Care Surgery, Department of Surgery  
16 The Johns Hopkins University School of Medicine  
17 Sheikh Zayed 6107C  
18 1800 Orleans St.  
19 Baltimore, MD 21287  
20 410 502 3122 (phone)  
21 410 502 3569 (fax)  
22 ehaut1@jhmi.edu

23

24

## 25 **1. Introduction**

### 26 **Public Health Impact of Venous Thromboembolism**

27 Venous thromboembolism (VTE), comprised of deep vein thrombosis (DVT) and/or  
28 pulmonary embolism (PE), affects 350,000-600,000 individuals in the United States  
29 annually. More than 100,000 people die each year in the United States as a result of  
30 PE.<sup>1</sup> Numerous studies have shown that VTE prophylaxis is vastly underutilized in  
31 hospitals<sup>2,3</sup> and the Agency for Healthcare Research and Quality (AHRQ) has listed  
32 strategies to improve VTE prevention on its top ten list for patient safety practices.<sup>4-7</sup>  
33 Consequently, numerous interventions have been implemented to improve prescription  
34 of VTE prophylaxis<sup>7-10</sup> with the implicit assumption that medications prescribed for  
35 hospitalized patients will always be administered.

### 36 **Deficits in the Administration of Prescribed Venous Thromboembolism** 37 **Prophylaxis**

38 Although the benefit of VTE prophylaxis is well established, many hospitalized patients  
39 do not receive adequate VTE prophylaxis. Studies from academic and community  
40 hospitals suggest that 10-20% of prescribed VTE prophylaxis doses are not  
41 administered, with the leading causing being patient refusal.<sup>11-15</sup> In order to understand  
42 practice at our own institution, we conducted an exploratory study and found that nearly  
43 12% of prescribed doses of pharmacologic VTE prophylaxis are not administered and  
44 almost 60% of missed doses are due to patient or family member refusal.<sup>11</sup> In a survey  
45 of 500 recently hospitalized patients, the National Blood Clot Alliance found that only  
46 28% and 15% respectively had basic knowledge of deep venous thrombosis (DVT) or  
47 pulmonary embolism (PE) despite the fact that 15% of participants had a history and  
48 43% had a family history of either condition. Similarly, we found that hospitalized  
49 patients have varying understanding and preferences regarding the harms of VTE and  
50 benefits of VTE prophylaxis.<sup>16</sup>

### 51 **Rationale for Patient-centered Education Bundle Trial**

52 Given the high frequency of patient refusal of VTE prophylaxis and significant  
53 knowledge gaps regarding VTE, there is an urgent need to educate patients and  
54 families on the importance and benefits of compliance with VTE prophylaxis. As a part  
55 of a study funded by the Patient-Centered Outcomes Research Institute (PCORI), we  
56 first educated nurses on the harms of VTE and the benefits of prophylaxis, showing that  
57 this first step intervention improved VTE prophylaxis administration by approximately  
58 10%.<sup>17</sup> The patient-centered education bundle will be delivered as an in-person, 1-on-1  
59 discussion session with a nurse educator. Supporting education materials include a 2-  
60 page education sheet and an educational video.<sup>18</sup>

### 61 **Study Objectives and Hypotheses**

62 We hypothesize that patient refusal of VTE prophylaxis is associated with significant  
63 knowledge gaps among patients regarding their risk of developing VTE and the benefits

64 of VTE prophylaxis, and that delivering an education bundle to patients who refuse VTE  
65 prophylaxis will improve acceptance of VTE prophylaxis and decrease rates of VTE.

66 The objective of this study is to determine the effect of delivering a patient education  
67 intervention bundle on incidence of VTE prophylaxis non-administration, and on  
68 incidence of VTE in hospitalized patients.

69 Primary Hypothesis: Patients on floors in the intervention arm will have a larger  
70 decrease in frequency of missed doses of VTE prophylaxis compared with patients on  
71 floors in the control arm.

72 Secondary Hypothesis: Patients in the intervention arm will have a larger decrease in  
73 frequency of VTE compared with patients in the control arm.

74

## 75 **2. Study Design**

### 76 A. Study Design

- 77 • Prospective cohort study

78

### 79 B. Eligibility Criteria

- 80 • All patients hospitalized on 16 medical/surgical (non-ICU) floors who are  
81 prescribed pharmacologic VTE prophylaxis will be eligible for inclusion
- 82 • INTERVENTION: All patients on the four study floors (2 medical floors and 2  
83 surgical floors) who miss at least one dose of VTE prophylaxis will be eligible  
84 to receive the patient education bundle intervention
- 85 • CONTROL: Patients on the 12 control floors (8 medical floors and 4 surgical  
86 floors) who miss doses of VTE prophylaxis will not receive the intervention
- 87 • Patients who move between floors during their hospitalization (Intervention →  
88 Control or Control → Intervention) will be excluded from analysis

89

### 90 C. Interventions

91 A patient-centered education bundle was created with input from key  
92 stakeholders including clinicians and patients. The bundle will be delivered in-  
93 person by a nurse educator. Patients may choose any one or a combination of  
94 components of the intervention including:

- 95 • In-person, 1-on-1 discussion session with the nurse educator.
- 96 • A two-page patient education paper
- 97 • Patient education video

98

### 99 D. Enrollment

100 When a dose of VTE prophylaxis is documented by the nurse as not  
101 administered in the electronic medication administration record (eMAR), a real-

102 time notification will be sent to the study team via pager and email. Upon  
103 receiving the alert, the nurse educator will engage the documenting bedside  
104 nurse to determine the cause for the missed dose. The nurse educator will then  
105 present the patient who missed a dose of pharmacologic VTE prophylaxis with  
106 the patient education bundle.

#### 107 108 E. Duration of Study

109 The proposed intervention will be conducted over an 8-month period (April 1,  
110 2015 through December 31, 2015).

111  
112 We will use the 6-month period before the intervention (October 1, 2014 through  
113 March 31, 2015) as the pre-implementation data period.

#### 114 115 F. Outcomes

- 116 a. Primary Outcome measure: VTE prophylaxis non-administration
- 117 b. Secondary Outcome Measures: VTE (defined by AHRQ PSI-12 diagnosis  
118 codes)

#### 119 G. Data Source

120 Patient demographic data and VTE outcomes will be extracted from the Johns  
121 Hopkins Hospital administrative database. Pharmacologic VTE prophylaxis  
122 medication administration data will be extracted directly from electronic medical  
123 administration record (eMAR).

### 124 125 3. Analytic methods

#### 126 127 A. Blinding

128 Our biostatistician team will be blinded to floor assignment arms.

#### 129 130 B. Baseline Characteristics

- 131 a. Comparison of both arms to ensure similarity at baseline
- 132 b. Descriptive analysis of baseline characteristics (i.e. simple counts and  
133 proportions by trial arm)

#### 134 135 C. Analytic Plan

136 Our primary hypothesis will be evaluated by comparing VTE prophylaxis non-  
137 administration before the intervention vs. during the intervention period. We will  
138 compare this change on intervention floors vs. control floors over the same  
139 period.

#### 140 141 D. Multi-level mixed effects linear regression

142 Due to the complexity of the multilevel structure of the data (i.e. multiple doses  
143 per patient across various hospitalizations, nurses and floors), multiple  
144 outputation<sup>11</sup> will be used to reduce the levels of hierarchical structure to the  
145 floor level and nurse level by randomly selecting one dosage per patient. By

146 reiterating the procedure 1000 times, we will estimate the odds ratios (ORs) and  
147 95% confidence intervals conditional on the floor and nurse. For estimating  
148 conditional odds ratios and their confidence intervals, the binomial family and a  
149 logit link will be used, and for estimating the conditional proportions, the Poisson  
150 family and a log link will be used. An a priori stratified (or subgroup) analyses  
151 (medical vs. surgical floors) will be performed using the same models to assess  
152 the same outcomes. All analyses will be on an Intention-to-Treat basis (all doses  
153 and patients on each floor).

154

155 1. US Department of Health and Human Services. The surgeon general's call to action to  
156 prevent deep vein thrombosis and pulmonary embolism.

157 <http://www.ncbi.nlm.nih.gov/books/NBK44178/>. Updated 2008. Accessed April 5, 2014.

158 2. Goldhaber SZ, Tapson VF, DVT FREE Steering Committee. A prospective registry of 5,451  
159 patients with ultrasound-confirmed deep vein thrombosis. *The American Journal of Cardiology*.  
160 2004;93(2):259-262.

161 3. Cohen AT, Tapson VF, Bergmann J, et al. Venous thromboembolism risk and prophylaxis in  
162 the acute hospital care setting (ENDORSE study): A multinational cross-sectional study. *The*  
163 *Lancet*. 2008;371(9610):387-394.

164 4. Shekelle PG, Wachter RM, Pronovost PJ, Schoelles K, McDonald KM, Dy SM, Shojania K,  
165 Reston J, Berger Z, Johnsen B, Larkin JW, Lucas S, Martinez K, Motala A, Newberry SJ, Noble  
166 M, Pfoh E, Ranji SR, Rennke S, Schmidt E, Shanman R, Sullivan N, Sun F, Tipton K, Treadwell  
167 JR, Tsou A, Vaiana ME, Weaver SJ, Wilson R, Winters BD. Making health care safer II: An  
168 updated critical analysis of the evidence for patient safety practices. . 2013;211.

169 5. Shekelle PG, Pronovost PJ, Wachter RM, et al. The top patient safety strategies that can be  
170 encouraged for adoption now. *Ann Intern Med*. 2013;158(5 Pt 2):365-368.

171 6. Haut ER, Lau BD. Prevention of venous thromboembolism: Brief update review. In: *In*  
172 *"making health care safer II: An updated critical analysis of the evidence for patient safety*  
173 *practices*. Rockville, MD.: Agency for Healthcare Research and Quality; 2013.

174 7. Lau BD, Haut ER. Practices to prevent venous thromboembolism: A brief review. *BMJ Qual*  
175 *Saf*. Mar 2014;23(3):187-195.

- 176 8. Durieux P, Nizard R, Ravaud P, Mounier N, Lepage E. A clinical decision support system for  
177 prevention of venous thromboembolism effect on physician behavior. *JAMA*.  
178 2000;283(21):2816-21.
- 179 9. Streiff MB, Carolan H, Hobson DB, et al. Lessons from the Johns Hopkins multi-disciplinary  
180 venous thromboembolism (VTE) prevention collaborative. *BMJ*. 2012;344:e3935.
- 181 10. Kucher N, Koo S, Quiroz R, et al. Electronic alerts to prevent venous thromboembolism  
182 among hospitalized patients. *N Engl J Med*. 2005;352(10):969-77.
- 183 11. Shermock KM, Lau BD, Haut ER, et al. Patterns of non-administration of ordered doses of  
184 venous thromboembolism prophylaxis: Implications for novel intervention strategies. *PLoS One*.  
185 2013;8(6):e66311.
- 186 12. Lau BD, Streiff MB, Kraus PS, et al. Missed doses of venous thromboembolism (VTE)  
187 prophylaxis at community hospitals: Cause for alarm. *J Gen Intern Med*. 2018;33(1):19-20.
- 188 13. Fanikos J, Stevens LA, Labreche M, et al. Adherence to pharmacological  
189 thromboprophylaxis orders in hospitalized patients. *Am J Med*. 2010;123(6):536-41.
- 190 14. Louis SG, Sato M, Geraci T, et al. Correlation of missed doses of enoxaparin with increased  
191 incidence of deep vein thrombosis in trauma and general surgery patients. *JAMA Surg*.  
192 2014;149(4):365-370.
- 193 15. Haut ER, Lau BD, Kraus PS, et al. Preventability of hospital-acquired venous  
194 thromboembolism. *JAMA Surg*. 2015;150(9):912.

- 195 16. Wong A, Streiff M, Haut E, et al. Patient perspectives on pharmacological venous  
196 thromboembolism prophylaxis at the Johns Hopkins hospital. *J Thromb Thrombolysis*.  
197 2013;35(3):416.
- 198 17. Lau BD, Shaffer DL, Hobson DB, et al. Effectiveness of two distinct web-based education  
199 tools for bedside nurses on medication administration practice for venous thromboembolism  
200 prevention: A randomized clinical trial. *PLoS One*. 2017;12(8):e0181664.
- 201 18. Popoola VO, Lau BD, Shihab HM, et al. Patient preferences for receiving education on  
202 venous thromboembolism prevention - A survey of stakeholder organizations. *PLoS One*.  
203 2016;11(3):e0152084.
- 204 19. Follmann D, Proschan M, Leifer E. Multiple outputation: Inference for complex clustered  
205 data by averaging analyses from independent data. *Biometrics*. 2003;59(2):420-429.
- 206
